# Supplementary material for: Calcite precipitation from by-product red gypsum in aqueous carbonation process
Source: Royal Society of Chemistry journal article supplement (doi:10.1039/c4ra05910g), 2014-01-01
Supplement: c4ra05910g1.pdf [file c4ra05910g1.pdf]

## Supported Information A

### Estimation of Work Index for By-Product Red Gypsum Sample

The standard laboratory procedures for estimating work index (Wi) can be divided into two categories, including tests on individual particles of rock and bulk rock material. A number of tests are required to get an idea of the rock strength. In this study, the standard of "Bond Pendulum test" was applied to estimate the work index of by-product red gypsum. In this test the energy required to crush a dry by-product red gypsum particle by the impact of two swinging hammers was determined. The standard method adopted by Bond is described as follows.

Two equal hammers, 13.6 kg each, about 0.7 m in length and the striking face 50×50 mm were suspended from two wheel rims. The hammers were raised to a known height and when released strike simultaneously on opposite sides of a dry test piece. The test piece was supported with its smallest dimension between the hammers. The hammers were initially raised to make an angle of 10° with the vertical then released. After the impact, the test piece was examined for fracture and the number of pieces broken was recorded. If the piece was not completely broken, the hammers were raised a further 5° and the process repeated till the piece was completely shattered. The heights of the hammers were recorded each time. Based on this standard, at least 10 samples should be used per test. However, 20 samples of by-product red gypsum were utilized, which this number is preferred in this standard.

The impact crushing strength (I) was calculated after each operation from the expression:

$$I = \frac{2 \times \text{Mass of one hammer} \times \text{Final height of hammer (kg * m)}}{d \text{ (mm)}}$$

Where:

d = thickness of sample (mm)

The value of I was averaged over the 10 to 20 tests. The impact crushing strength of samples was used to calculate the Bond's crushing work index using the expression:

$$W_i(\text{kWh/t}) = \frac{C \times I}{\text{Relative density of sample}}$$

Where:

C is a constant which converts the impact crushing strength, numerically and dimensionally to the work index. C equals to 2.59 in the original Bond equation.

Calculations:

$$I = \frac{2 \times 13.6(\text{kg}) \times 1 \text{ (m)}}{3 \text{ (mm)}} = 9.066$$

$$W_i\left(\frac{\text{kWh}}{\text{t}}\right) = \frac{2.59 \times 9.066}{2.18} = 10.77$$

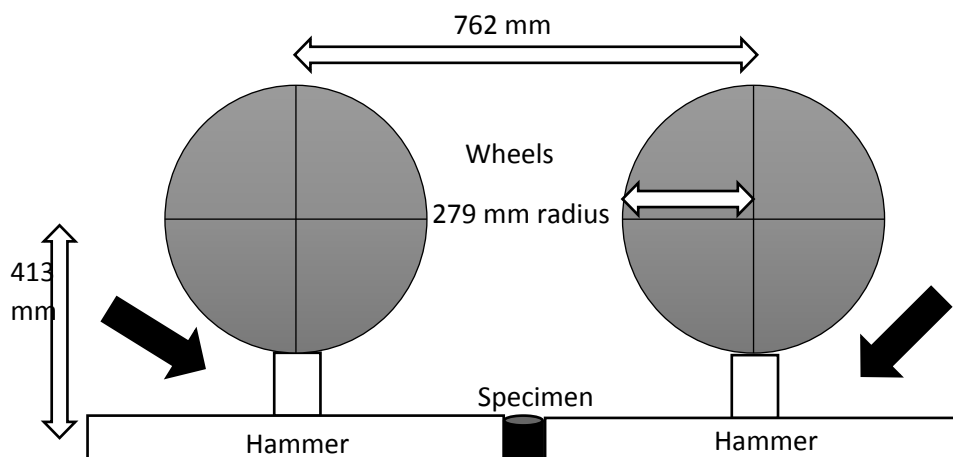

SIA: Bond's impact test to estimate work index of by-product red gypsum samples

Supported Information B

XRD Pattern

Pattern: PDF 00-006-0046 Radiation: 1.54060 Quality: User modified

| Formula                                                        |               | Ca S O4 ·2 H2 O         |  | d       | 2θ     | I    | h  | k | l |
|----------------------------------------------------------------|---------------|-------------------------|--|---------|--------|------|----|---|---|
| Name                                                           |               | Calcium Sulfate Hydrate |  | 7.59000 | 11.650 | 6117 | 0  | 2 | 0 |
| Name (mineral)                                                 |               | Gypsum                  |  | 4.27709 | 20.751 | 3058 | -1 | 2 | 1 |
| Name (common)                                                  |               |                         |  | 3.79182 | 23.442 | 1223 | 0  | 3 | 1 |
|                                                                |               |                         |  | 3.16415 | 28.180 | 245  | -1 | 1 | 2 |
|                                                                |               |                         |  | 3.06081 | 29.152 | 3364 | -1 | 4 | 1 |
|                                                                |               |                         |  | 2.86326 | 31.213 | 1529 | 0  | 0 | 2 |
|                                                                |               |                         |  | 2.78887 | 32.068 | 367  | -2 | 1 | 1 |
|                                                                |               |                         |  | 2.67897 | 33.421 | 1713 | 0  | 2 | 2 |
|                                                                |               |                         |  | 2.58871 | 34.622 | 245  | -2 | 0 | 2 |
| Lattice:                                                       |               | Monoclinic              |  | 2.53000 | 35.452 | 61   | 0  | 6 | 0 |
| S.G.:                                                          |               | I2/a (15)               |  | 2.49820 | 35.919 | 367  | 2  | 0 | 0 |
|                                                                |               | Mol. weight = 172.17    |  | 2.45012 | 36.648 | 245  | -2 | 2 | 2 |
|                                                                |               | Volume [CD] = 493.75    |  | 2.40262 | 37.399 | 245  | 1  | 4 | 1 |
|                                                                |               | Dx =                    |  | 2.21385 | 40.723 | 367  | -1 | 5 | 2 |
|                                                                |               | Dm =                    |  | 2.13855 | 42.225 | 122  | -2 | 4 | 2 |
|                                                                |               | I/Icor = -1.000         |  | 2.07557 | 43.570 | 612  | -1 | 2 | 3 |
| a = 5.68000                                                    | alpha =       |                         |  | 2.07291 | 43.629 | 489  | -2 | 5 | 1 |
| b = 15.18000                                                   | beta = 118.40 |                         |  | 1.98928 | 45.564 | 245  | 1  | 7 | 0 |
| c = 6.51000                                                    | gamma = 0     |                         |  | 1.95531 | 46.401 | 122  | 2  | 1 | 1 |
| a/b = 0.37418                                                  | Z = 4         |                         |  | 1.89750 | 47.902 | 979  | 0  | 8 | 0 |
| c/b = 0.42885                                                  |               |                         |  | 1.87580 | 48.492 | 612  | -1 | 4 | 3 |
|                                                                |               |                         |  | 1.86548 | 48.777 | 245  | -3 | 1 | 2 |
|                                                                |               |                         |  | 1.83718 | 49.579 | 122  | 2  | 3 | 1 |
|                                                                |               |                         |  | 1.80938 | 50.393 | 612  | -2 | 6 | 2 |
|                                                                |               |                         |  | 1.80003 | 50.673 | 245  | -3 | 2 | 1 |
| Deleted Or Rejected By: Deleted by 00-033-0311                 |               |                         |  | 1.77763 | 51.358 | 612  | 2  | 6 | 0 |
| Unit Cell Data Source: Powder Diffraction                      |               |                         |  | 1.70575 | 53.692 | 122  | -2 | 5 | 3 |
|                                                                |               |                         |  | 1.68285 | 54.482 | 122  | -3 | 2 | 3 |
|                                                                |               |                         |  | 1.66503 | 55.114 | 245  | -3 | 4 | 1 |
|                                                                |               |                         |  | 1.64178 | 55.963 | 122  | -1 | 6 | 3 |
|                                                                |               |                         |  | 1.61894 | 56.823 | 367  | 1  | 8 | 1 |
|                                                                |               |                         |  | 1.59819 | 57.630 | 61   | -3 | 5 | 2 |
|                                                                |               |                         |  | 1.58248 | 58.257 | 122  | -1 | 1 | 4 |
|                                                                |               |                         |  | 1.53040 | 60.441 | 122  | -2 | 8 | 2 |
|                                                                |               |                         |  | 1.52215 | 60.804 | 122  | 1  | 2 | 3 |
|                                                                |               |                         |  | 1.49561 | 62.000 | 61   | -1 | 9 | 2 |
| Primary Reference                                              |               |                         |  |         |        |      |    |   |   |
| Publication: Private Communication                             |               |                         |  |         |        |      |    |   |   |
| Authors: Gillery, F., The PA State Univ., Univ. Park, PA, USA. |               |                         |  |         |        |      |    |   |   |
| Radiation: CuKα1                                               |               | Filter: Not specified   |  |         |        |      |    |   |   |
| Wavelength: 1.54060                                            |               | d-spacing:              |  |         |        |      |    |   |   |
| SS/FOM: 10.6 (0.048,59)                                        |               |                         |  |         |        |      |    |   |   |

**Supported Information C**  
**Calculation of the CO<sub>2</sub> Uptake for Mineral Carbonation Process of By-Product Red Gypsum**

$$CO_2 \text{ uptake (mmol/g)} = \sum_i^n \frac{(pCO_{2 \text{ in}} - pCO_{2 \text{ out}})_i * \Delta t * Q}{R * T * M}$$

$pCO_{2 \text{ out}}$ : mean value of  $pCO_2$  in the outflow (partial pressure of CO<sub>2</sub> up to 30%)

$\Delta t$ : time interval (1 min)

$Q$ : flow rate (5 L/min)

Flow meter rates are reported in standard liters per minute (slpm), which is the number of liters per minute under standard conditions of temperature and pressure.

$R$ : gas constant (8.32 J/mol\*K)

$T$ : temperature (60 °C equals to 333.15 K)

$M$ : mass of by-product red gypsum (10 g).

**(1) Temperature**

$$CO_2 \text{ uptake (mmol/g)} = \sum_i^n \frac{(7) \times 1 \times 5}{8.32 \times 298.15 \times 10} = \frac{35}{24806.08}$$

CO<sub>2</sub> uptake = 1.41 (mmol/g)

$$CO_2 \text{ uptake (mmol/g)} = \sum_i^n \frac{(15) \times 1 \times 5}{8.32 \times 323.15 \times 10} = \frac{75}{26886.08}$$

CO<sub>2</sub> uptake = 2.78 (mmol/g)

$$CO_2 \text{ uptake (mmol/g)} = \sum_i^n \frac{(15.8) \times 1 \times 5}{8.32 \times 333.15 \times 10} = \frac{79}{27718.08}$$

CO<sub>2</sub> uptake = 2.85 (mmol/g)

$$CO_2 \text{ uptake (mmol/g)} = \sum_i^n \frac{(10.4) \times 1 \times 5}{8.32 \times 348.15 \times 10} = \frac{52}{28966.08}$$

CO<sub>2</sub> uptake = 1.79 (mmol/g)

**(2) Liquid to solid ratio**

$$CO_2 \text{ uptake (mmol/g)} = \sum_i^n \frac{(15.8) \times 1 \times 5}{8.32 \times 333.15 \times 10} = \frac{79}{27718.08}$$

CO<sub>2</sub> uptake = 2.85 (mmol/g)

$$CO_2 \text{ uptake (mmol/g)} = \sum_i^n \frac{(13.9) \times 1 \times 5}{8.32 \times 333.15 \times 10} = \frac{69.5}{27718.08}$$

CO<sub>2</sub> uptake = 2.50 (mmol/g)

$$CO_2 \text{ uptake (mmol/g)} = \sum_i^n \frac{(9.8) \times 1 \times 5}{8.32 \times 333.15 \times 10} = \frac{49}{27718.08}$$

CO<sub>2</sub> uptake = 1.76 (mmol/g)

$$CO_2 \text{ uptake (mmol/g)} = \sum_i^n \frac{(11.9) \times 1 \times 5}{8.32 \times 333.15 \times 10} = \frac{59.5}{27718.08}$$

CO<sub>2</sub> uptake = 2.14 (mmol/g)

**(3) Stirring rate**

$$CO_2 \text{ uptake (mmol/g)} = \sum_i^n \frac{(8.9) \times 1 \times 5}{8.32 \times 333.15 \times 10} = \frac{44.5}{27718.08}$$

CO<sub>2</sub> uptake = 1.6 (mmol/g)

$$CO_2 \text{ uptake (mmol/g)} = \sum_i^n \frac{(11.9 - 20\%) \times 1 \times 5}{8.32 \times 333.15 \times 10} = \frac{59.5}{27718.08}$$

CO<sub>2</sub> uptake = 2.14 (mmol/g)

$$CO_2 \text{ uptake (mmol/g)} = \sum_i^n \frac{(14.35) \times 1 \times 5}{8.32 \times 333.15 \times 10} = \frac{71.75}{27718.08}$$

CO<sub>2</sub> uptake = 2.58 (mmol/g)

$$CO_2 \text{ uptake (mmol/g)} = \sum_i^n \frac{(15.8) \times 1 \times 5}{8.32 \times 333.15 \times 10} = \frac{79}{27718.08}$$

CO<sub>2</sub> uptake = 2.85 (mmol/g)

**(4) Particle size**

$$CO_2 \text{ uptake (mmol/g)} = \sum_i^n \frac{(15.8) \times 1 \times 5}{8.32 \times 333.15 \times 10} = \frac{79}{27718.08}$$

CO<sub>2</sub> uptake = 2.85 (mmol/g)

$$CO_2 \text{ uptake (mmol/g)} = \sum_i^n \frac{(11.18) \times 1 \times 5}{8.32 \times 333.15 \times 10} = \frac{55.90}{27718.08}$$

CO<sub>2</sub> uptake = 2.01 (mmol/g)

$$CO_2 \text{ uptake (mmol/g)} = \sum_i^n \frac{(7) \times 1 \times 5}{8.32 \times 333.15 \times 10} = \frac{35}{27718.08}$$

CO<sub>2</sub> uptake = 1.26 (mmol/g)

$$CO_2 \text{ uptake (mmol/g)} = \sum_i^n \frac{(4.8) \times 1 \times 5}{8.32 \times 333.15 \times 10} = \frac{24}{27718.08}$$

CO<sub>2</sub> uptake = 0.86 (mmol/g)

**Supported Information D**

**Calculation of the Amount of Output and Input needed for Mineral Carbonation Process of By-Product Red Gypsum**

In this research, the cost calculation of carbonation process is performed based on reference year in 2013. The energy used in the process of binding one tonne CO<sub>2</sub> in red gypsum represents a kilowatt hour of power per unit tonne CO<sub>2</sub> (kWh/tCO<sub>2</sub>) stored. Additionally, the US Dollar (\$) is considered as reference currency. The price of electricity per 1 kWh is 0.13 US\$ (equal to 0.43 RM) based on the Ministry of Energy, Green Technology, and Water in Malaysia.

The cost of red gypsum mining is negligible. Three assumptions were made based on the experimental results to simplify the work. First, it was assumed that one t CO<sub>2</sub> is sequestered. Second, one t CO<sub>2</sub> sequestration was performed based on the amount of red gypsum required. Third, the optimum liquid to solid ratio was considered to calculate the related cost.

**Assumptions:**

1 g = 1 ml: if specific weight equal to 1 g/cm<sup>3</sup> (or 1 wt.% = 1 ml)

1 t of CO<sub>2</sub> = 1.977 L

CO<sub>2</sub> uptake = 15.8% → 7.99 g

Distilled water needed for dissolution and carbonation experiment:

H<sub>2</sub>SO<sub>4</sub> dilution → 92.95 ml

+ =

144.450 ml

NH<sub>3</sub> solution → 51.50 ml

Products:

- (1) Product 1 (TiO<sub>2</sub>): 0.0692 t per one t by-product red gypsum
- (2) Product 2 (Fe<sub>2</sub>O<sub>3</sub>): 0.280 t per one t by-product red gypsum
- (3) Product 3 (CaCO<sub>3</sub>): 0.633 t per one t by-product red gypsum
- (4) NH<sub>4</sub>HSO<sub>4</sub>: 0.125 t per one t by-product red gypsum

**SID1:** The calculation of output and input materials needed for mineral carbonation process of by-product red gypsum

| <b>Input</b>                                         |                                      |                        |
|------------------------------------------------------|--------------------------------------|------------------------|
| Chemical and Material                                | Specific weight (g/cm <sup>3</sup> ) | The amount needed (kg) |
| CO <sub>2</sub><br>(gaseous phase)                   | 1.977<br>(at 1 atm and 0 °C)         | 1000                   |
| Red gypsum                                           | 2.18                                 | 1251                   |
| H <sub>2</sub> SO <sub>4</sub><br>(35%)              | 1.84                                 | 2720                   |
| NH <sub>4</sub> OH<br>(NH <sub>3</sub> solution 50%) | 0.88                                 | 4620                   |
| Distilled water                                      | 1                                    | 14445                  |
| <b>Output</b>                                        |                                      |                        |
| TiO <sub>2</sub>                                     | 4.23                                 | 86.570                 |
| Fe <sub>2</sub> O <sub>3</sub>                       | 5.24                                 | 350.280                |
| CaCO <sub>3</sub>                                    | 2.71                                 | 792.130                |
| (NH <sub>4</sub> )HSO <sub>4</sub>                   | 1.77                                 | -7067.796 <sup>a</sup> |

<sup>a</sup> Some chemicals are produced in the carbonation process, which are shown in the negative values.

Total costs = (transportation + energy consumption + chemicals and materials) – products income

Total costs = (11+1.47+208.44) – 158.60 = 62.31 US\$

**SID2:** Mass balance of the input and output routes in the carbonation process of by-product red gypsum.

| <b>Input (t)</b>               |                            |
|--------------------------------|----------------------------|
| Necessary chemicals            | The optimum L/S<br>10 ml/g |
| CO <sub>2</sub>                | 1                          |
| Red gypsum                     | 1.251                      |
| H <sub>2</sub> SO <sub>4</sub> | 2.720                      |
| NH <sub>4</sub> OH             | 4.620                      |
| Distilled water                | 14.445                     |

| Output (t)                         |                     |
|------------------------------------|---------------------|
| Product 1                          | 0.086               |
| Product 2                          | 0.350               |
| CaCO <sub>3</sub>                  | 0.792               |
| (NH <sub>4</sub> )HSO <sub>4</sub> | -7.067 <sup>a</sup> |

<sup>a</sup> Some chemicals are produced in the carbonation process, which are shown in the negative values.

**SID3:** The amount of energy consumption for both input and output routes in mineral carbonation process of by-product red gypsum

| Procedures | Energy consumption<br>(kWh/t) |
|------------|-------------------------------|
|            | L/S = 10 ml/g                 |
| Mining     | -                             |
| Crushing   | 0.643                         |
| Filtration | 0.25                          |
| Work index | 10.77                         |
| Total      | 11.663                        |

**SID4:** The amount and cost of chemical needed in mineral carbonation process for sequestration 1 t CO<sub>2</sub>

| Chemical                       | Amount needed<br>(t) | Cost per t (US\$) | Cost<br>(US\$) |
|--------------------------------|----------------------|-------------------|----------------|
| Red gypsum                     | 1.251                | 00.00             | 00.00          |
| H <sub>2</sub> SO <sub>4</sub> | 2.72                 | 33.00             | 89.76          |
| NH <sub>3</sub> solution       | 4.620                | 21.00             | 97.02          |
| Distilled water                | 14.445               | 1.50              | 21.66          |
| Total                          | -                    | -                 | 208.44         |

L/S = 10 ml/g  
t: tonne

**SID5:** The amount of sold products obtained from sequestration 1 t CO<sub>2</sub>

| Products                                                   | Amount achieved (t) | Sell per t industrial<br>grade (US\$) | Income<br>(US\$) |
|------------------------------------------------------------|---------------------|---------------------------------------|------------------|
| Product 1<br>(rich in TiO <sub>2</sub> )                   | 0.086               | 115.00                                | 9.89             |
| Product 2<br>(rich in Fe)                                  | 0.350               | 32.00                                 | 11.2             |
| Product 3<br>(CaCO <sub>3</sub> )                          | 0.792               | 13.00                                 | 10.29            |
| Remained solution<br>[(NH <sub>4</sub> )HSO <sub>4</sub> ] | 7.067796            | 18                                    | 127.22           |
| Total                                                      | -                   | -                                     | 158.60           |

L/S = 10 ml/g  
t: tonne

**SID6:** The total cost of energy consumed for 1 t CO<sub>2</sub> sequestration

| Step            | Energy consumption<br>(kWh/t) | Price of electricity per<br>1 kWh (US\$) | Cost<br>(US\$) |
|-----------------|-------------------------------|------------------------------------------|----------------|
| Crushing        | 0.643                         | 0.13                                     | 0.08           |
| Filtration<br>+ | 0.25                          | 0.13                                     | 0.03           |
| Precipitation   | 10.77                         | 0.13                                     | 1.40           |
| Total           | 11.663                        | -                                        | 1.51           |

**SID7:** The total cost of energy consumed for 1 t CO<sub>2</sub> avoided

| Step            | Energy consumption<br>(kWh/t) | Price of electricity per<br>1 kWh (US\$) | Cost<br>(US\$) |
|-----------------|-------------------------------|------------------------------------------|----------------|
| Crushing        | 0.643                         | 0.13                                     | 0.08           |
| Filtration<br>+ | 0.25                          | 0.13                                     | 0.03           |
| Precipitation   | 10.77                         | 0.13                                     | 1.40           |
| Heat            | 11                            | 0.13                                     | 1.43           |
| Power           | 24                            | 0.13                                     | 3.12           |
| Total           | 11.663                        | -                                        | 5.98           |

Total dissolved inorganic carbon (TDIC) was determined as carbon in a gas sample taken from gas-tight cylinder and in a sample after mineral carbonation process. The amount of TDIC (mmol) was calculated by applying Henry's law considering the known volumes of headspace and solution:

$$TDIC = ppm \left( K_H + \frac{V_G}{R.T.V_W} \right)$$

$K_H$ : henry constant ( $10^{-1.41}$  mol/l.atm at 25 °C)

$V_G$ : gas volume of headspace (l)

$V_W$ : volume of solution (l)

Additionally, based on the amount of procedure variables such as reaction temperature, liquid to solid ratio, and stirring rate; CO<sub>2</sub> uptake by red gypsum suspension were experimentally determined. The mass transfer of CO<sub>2</sub> into solid carbonate was calculated as the difference between the amount of CO<sub>2</sub> uptake and TDIC.
